# Supplementary material for: Semantics about soil organic carbon storage: DATA4C+, a comprehensive thesaurus and classification of management practices in agriculture and forestry
Source: Copernicus journal article supplement (doi:10.5194/soil-9-89-2023), 2023-02-10
Supplement: Supplementary file 1 [file soil-9-89-2023-supplement.zip]

Archive with 3 entries (3 files):
- Supplement 2_edit.xlsx
- soil-9-89-2023-supplement-title-page.pdf
- Supplement 1.pdf
