# Supplementary material for: Semantics about soil organic carbon storage: DATA4C+, a comprehensive thesaurus and classification of management practices in agriculture and forestry
Source: Copernicus journal article supplement (doi:10.5194/soil-9-89-2023), 2023-02-10
Supplement: Supplementary file 1 [file soil-9-89-2023-supplement.zip › soil-9-89-2023-supplement-title-page.pdf]

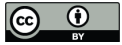

*Supplement of*

**Semantics about soil organic carbon storage: DATA4C+,  
a comprehensive thesaurus and classification of management  
practices in agriculture and forestry**

**Kenji Fujisaki et al.**

*Correspondence to:* Julien Demenois ([julien.demenois@cirad.fr](mailto:julien.demenois@cirad.fr))

- [soil-9-89-2023-supplement-title-page.pdf](#)
- [Supplement 1.pdf](#)
- [Supplement 2\\_edit.xlsx](#)

The copyright of individual parts of the supplement might differ from the article licence.
