# Supplementary material for: Semantics about soil organic carbon storage: DATA4C+, a comprehensive thesaurus and classification of management practices in agriculture and forestry
Source: Copernicus journal article supplement (doi:10.5194/soil-9-89-2023), 2023-02-10
Supplement: Supplementary file 1 [file soil-9-89-2023-supplement.zip › Supplement 1.pdf]

Supplementary material 1. Examples of land-use change and land management practices classification for the assessment of soil organic carbon stock change (see supplementary material 2 for the full list used)

| Reference                                                                            | Forests                                                                                                                                                              | Annual and perennial croplands                                                                                                                                                                                                                                                                                                                                                                                                                                                                           | Grasslands                                                                                                                                            | Land-use change                                                                                                                                |
|--------------------------------------------------------------------------------------|----------------------------------------------------------------------------------------------------------------------------------------------------------------------|----------------------------------------------------------------------------------------------------------------------------------------------------------------------------------------------------------------------------------------------------------------------------------------------------------------------------------------------------------------------------------------------------------------------------------------------------------------------------------------------------------|-------------------------------------------------------------------------------------------------------------------------------------------------------|------------------------------------------------------------------------------------------------------------------------------------------------|
| (Smith et al., 2008)<br>IPCC report for GHG mitigation in agriculture                |                                                                                                                                                                      | <ul style="list-style-type: none"> <li>- Improved agronomic practices</li> <li>- Nutrient management</li> <li>- No till &amp; residue retention</li> <li>- Water management</li> <li>- Manure application</li> </ul>                                                                                                                                                                                                                                                                                     |                                                                                                                                                       |                                                                                                                                                |
| (Paustian et al., 2016)<br>Land management practices for climate-smart soils         |                                                                                                                                                                      | <ul style="list-style-type: none"> <li>- Add nutrients; add lime; grow N fixing species</li> <li>- Grow cover crops; reduce or vegetate fallow fields</li> <li>- Reduce to economic-optimal rates</li> <li>- Reduce or halt tilling; implement residue retention</li> <li>- Improve timing and placement; use enhanced efficiency fertilizer</li> <li>- Rotate perennials; use agroforestry; use high-C input species; grow cover crops</li> <li>- Add amendments such as compost and biochar</li> </ul> | <ul style="list-style-type: none"> <li>- Convert to perennial vegetation</li> <li>- Restore to wetland</li> </ul>                                     |                                                                                                                                                |
| (Griscom et al., 2017)<br>Evaluation of land management practices for GHG mitigation | <ul style="list-style-type: none"> <li>- Natural forest management</li> <li>- Improved plantations</li> <li>- Avoided woodfuel</li> <li>- Fire management</li> </ul> | <ul style="list-style-type: none"> <li>- Biochar</li> <li>- Trees in croplands</li> <li>- Nutrient management</li> <li>- Conservation agriculture</li> <li>- Improved rice</li> </ul>                                                                                                                                                                                                                                                                                                                    | <ul style="list-style-type: none"> <li>- Grazing-feed</li> <li>- Grazing-animal management</li> <li>- Optimal intensity</li> <li>- Legumes</li> </ul> | <ul style="list-style-type: none"> <li>- Reforestation</li> <li>- Avoided forest conversion</li> <li>- Avoided grassland conversion</li> </ul> |

|                                                                                                                    |  |                                                                                                                                                                                                                                                                                                                                          |                                |                                                                                            |
|--------------------------------------------------------------------------------------------------------------------|--|------------------------------------------------------------------------------------------------------------------------------------------------------------------------------------------------------------------------------------------------------------------------------------------------------------------------------------------|--------------------------------|--------------------------------------------------------------------------------------------|
| <p>(Chotte et al., 2019)<br/>Sustainable land<br/>management<br/>practices for land<br/>degradation neutrality</p> |  | <ul style="list-style-type: none"> <li>- Agroforestry</li> <li>- No/minimum tillage</li> <li>- Crop rotation</li> <li>- Intercropping</li> <li>- Green manuring</li> <li>- Composting/mulching</li> <li>- Manuring</li> <li>- Integrated crop/livestock systems</li> <li>- Conservation agriculture</li> <li>- Fertilizer use</li> </ul> | <p>- Reduce herd densities</p> | <ul style="list-style-type: none"> <li>- Afforestation</li> <li>- Reforestation</li> </ul> |
|--------------------------------------------------------------------------------------------------------------------|--|------------------------------------------------------------------------------------------------------------------------------------------------------------------------------------------------------------------------------------------------------------------------------------------------------------------------------------------|--------------------------------|--------------------------------------------------------------------------------------------|

|                                                                                                                                                          |                                                                                                                                                                                                                                                                                                                                                                                                                        |                                                                                                                                                                                                                                                                                                                                                                                                                                                                                                                                                                                                                                                                                                                                                                                                                                                                                                                                                                                                                                                                                                                                                                                                                                                                                                                                                                                                                                                                                                                                                                                                                                                                                                                            |                                                                                                                                                                                                                                                                                                                                                                                                                                                                                                                                                                                         |                                                                                                                                                                                                                                                                                                                                              |
|----------------------------------------------------------------------------------------------------------------------------------------------------------|------------------------------------------------------------------------------------------------------------------------------------------------------------------------------------------------------------------------------------------------------------------------------------------------------------------------------------------------------------------------------------------------------------------------|----------------------------------------------------------------------------------------------------------------------------------------------------------------------------------------------------------------------------------------------------------------------------------------------------------------------------------------------------------------------------------------------------------------------------------------------------------------------------------------------------------------------------------------------------------------------------------------------------------------------------------------------------------------------------------------------------------------------------------------------------------------------------------------------------------------------------------------------------------------------------------------------------------------------------------------------------------------------------------------------------------------------------------------------------------------------------------------------------------------------------------------------------------------------------------------------------------------------------------------------------------------------------------------------------------------------------------------------------------------------------------------------------------------------------------------------------------------------------------------------------------------------------------------------------------------------------------------------------------------------------------------------------------------------------------------------------------------------------|-----------------------------------------------------------------------------------------------------------------------------------------------------------------------------------------------------------------------------------------------------------------------------------------------------------------------------------------------------------------------------------------------------------------------------------------------------------------------------------------------------------------------------------------------------------------------------------------|----------------------------------------------------------------------------------------------------------------------------------------------------------------------------------------------------------------------------------------------------------------------------------------------------------------------------------------------|
| <p>(Smith et al., 2020)<br/>Land management practices for food security, climate change mitigation, and against desertification and land degradation</p> | <p>Improved forest management refers to management practices in forests for the purpose of climate change mitigation. It includes a wide variety of practices affecting the growth of trees and the biomass removed, including improved regeneration (natural or artificial) and a better schedule, intensity, and execution of operations (thinning, selective logging, final cut; reduced impact logging, etc.).</p> | <ul style="list-style-type: none"> <li>- Improved cropland management is a collection of practices consisting of (a) management of the crop: including high carbon input practices, for example, improved crop varieties, crop rotation, use of cover crops, perennial cropping systems, integrated production systems, crop diversification, agricultural biotechnology; (b) nutrient management: including optimized fertilizer application rate, fertilizer type (organic manures, compost, and mineral), timing, precision application, nitrification inhibitors; (c) reduced tillage intensity and residue retention; (d) improved water management: including drainage of waterlogged mineral soils and irrigation of crops in arid/ semiarid conditions; (e) improved rice management: including water management such as mid-season drainage and improved fertilization and residue management in paddy rice systems; and (f) biochar application</li> <li>- Practices that increase soil organic matter content include a) land-use change to an ecosystem with higher equilibrium soil carbon levels ; (b) management of the vegetation: including high carbon input practices, for example, improved varieties, rotations and cover crops, perennial cropping systems, biotechnology to increase inputs and recalcitrance of below ground carbon; (c) nutrient management and organic material input to increase carbon returns to the soil: including optimized fertilizer and organic material application rate, type, timing, and precision application; (d) reduced tillage intensity and residue retention; and (e) improved water management: including irrigation in arid/semiarid conditions</li> </ul> | <p>Improved grazing land management is a collection of practices consisting of (a) management of vegetation: including improved grass varieties/sward composition, deep rooting grasses, increased productivity, and nutrient management; (b) animal management: including appropriate stocking densities fit to carrying capacity, fodder banks, and fodder diversification; and (c) fire management: improved use of fire for sustainable grassland management, including fire prevention and improved prescribed burning (see also fire management as a separate practice below)</p> | <ul style="list-style-type: none"> <li>- Reduced grassland conversion to cropland</li> <li>- Reduced deforestation and degradation</li> <li>- Reforestation and forest restoration</li> <li>- Afforestation</li> <li>- Land-use change to an ecosystem with higher equilibrium soil carbon levels (e.g., from cropland to forest)</li> </ul> |
|----------------------------------------------------------------------------------------------------------------------------------------------------------|------------------------------------------------------------------------------------------------------------------------------------------------------------------------------------------------------------------------------------------------------------------------------------------------------------------------------------------------------------------------------------------------------------------------|----------------------------------------------------------------------------------------------------------------------------------------------------------------------------------------------------------------------------------------------------------------------------------------------------------------------------------------------------------------------------------------------------------------------------------------------------------------------------------------------------------------------------------------------------------------------------------------------------------------------------------------------------------------------------------------------------------------------------------------------------------------------------------------------------------------------------------------------------------------------------------------------------------------------------------------------------------------------------------------------------------------------------------------------------------------------------------------------------------------------------------------------------------------------------------------------------------------------------------------------------------------------------------------------------------------------------------------------------------------------------------------------------------------------------------------------------------------------------------------------------------------------------------------------------------------------------------------------------------------------------------------------------------------------------------------------------------------------------|-----------------------------------------------------------------------------------------------------------------------------------------------------------------------------------------------------------------------------------------------------------------------------------------------------------------------------------------------------------------------------------------------------------------------------------------------------------------------------------------------------------------------------------------------------------------------------------------|----------------------------------------------------------------------------------------------------------------------------------------------------------------------------------------------------------------------------------------------------------------------------------------------------------------------------------------------|

|                                                                                                                     |  |                                                                                                                                                                                                                                                                                                                                                                                                                                                                                      |                                                                                                                                                                                                     |  |
|---------------------------------------------------------------------------------------------------------------------|--|--------------------------------------------------------------------------------------------------------------------------------------------------------------------------------------------------------------------------------------------------------------------------------------------------------------------------------------------------------------------------------------------------------------------------------------------------------------------------------------|-----------------------------------------------------------------------------------------------------------------------------------------------------------------------------------------------------|--|
| (Bai et al., 2019)<br>Effect of climate-smart agriculture practices on soil carbon stocks                           |  | <ul style="list-style-type: none"> <li>- Conservation tillage <ul style="list-style-type: none"> <li>- no-till</li> <li>- reduced tillage</li> </ul> </li> <li>- Cover crops</li> <li>- Biochar</li> <li>- Other agronomic practices: crop residues, nitrogen fertilization, irrigation, and crop rotation</li> </ul>                                                                                                                                                                |                                                                                                                                                                                                     |  |
| (Chambers et al., 2016)<br>4P1000 potential in the USA                                                              |  | <ul style="list-style-type: none"> <li>- Conservation cover</li> <li>- Conservation crop rotation</li> <li>- Residue and tillage management, no-till</li> <li>- Strip till</li> <li>- Contour farming</li> <li>- Contour buffer strips</li> <li>- Residue and tillage management, reduced till</li> <li>- Field border</li> <li>- Filter strips</li> <li>- Grassed waterways</li> <li>- Strip-cropping</li> <li>- Vegetative barriers</li> <li>- Herbaceous wind barriers</li> </ul> | <ul style="list-style-type: none"> <li>- Forage and biomass planting</li> <li>- Prescribed grazing</li> <li>- Range planting</li> </ul>                                                             |  |
| (Corbeels et al., 2019)<br>4P1000 potential in sub-Saharan Africa through agroforestry and conservation agriculture |  | <p>Conservation agriculture:</p> <ul style="list-style-type: none"> <li>- Minimum/no tillage</li> <li>- Minimum/no tillage + residues</li> <li>- Minimum/no tillage + residues + intercropping or rotation</li> </ul> <p>Agroforestry:<br/>Alley cropping<br/>Multistrata systems<br/>Fallows<br/>Parklands</p>                                                                                                                                                                      | Parklands                                                                                                                                                                                           |  |
| (Pellerin et al., 2019)<br>4P1000 potential in mainland France                                                      |  | <ul style="list-style-type: none"> <li>- No-tillage</li> <li>- Cover crops</li> <li>- Increase of temporary grasslands in crop rotations</li> <li>- Increase exogenous organic matter application</li> <li>- Agroforestry</li> <li>- Hedgerows</li> <li>- Cover crops in vineyards</li> </ul>                                                                                                                                                                                        | <ul style="list-style-type: none"> <li>- Moderate intensification of grasslands: fertilization, increase leguminous species, increase grass export</li> <li>- Haying rather than grazing</li> </ul> |  |

|                                                                               |                                                                                                                                                                                                                                                                                                                                                                        |                                                                                                                                                                                                                                         |                                                                                                                                                                                          |                                                                                                     |
|-------------------------------------------------------------------------------|------------------------------------------------------------------------------------------------------------------------------------------------------------------------------------------------------------------------------------------------------------------------------------------------------------------------------------------------------------------------|-----------------------------------------------------------------------------------------------------------------------------------------------------------------------------------------------------------------------------------------|------------------------------------------------------------------------------------------------------------------------------------------------------------------------------------------|-----------------------------------------------------------------------------------------------------|
| (Conant et al., 2017)<br>Effect of grassland management on soil carbon stocks |                                                                                                                                                                                                                                                                                                                                                                        |                                                                                                                                                                                                                                         | <ul style="list-style-type: none"> <li>- Fertilization</li> <li>- Fire</li> <li>- Grazing</li> <li>- Grass ley</li> <li>- Reclamation</li> </ul>                                         | <ul style="list-style-type: none"> <li>- Cultivation to grass</li> <li>- Native to grass</li> </ul> |
| (Batjes, 2019)<br>Effect of grassland management on soil carbon stocks        |                                                                                                                                                                                                                                                                                                                                                                        |                                                                                                                                                                                                                                         | <ul style="list-style-type: none"> <li>- Controlled grazing</li> <li>- Adjusting stocking rates</li> <li>- Improved pastures with leguminous crops</li> <li>- Fire management</li> </ul> |                                                                                                     |
| (Mayer et al., 2020)<br>Effect of forest management on soil carbon stocks     | <ul style="list-style-type: none"> <li>- Nitrogen addition</li> <li>- Selection of species with N-fixing associates</li> <li>- Trees species selection</li> <li>- Management of tree species diversity</li> <li>- Management of stand density and thinning</li> <li>- Removal of forest residues</li> <li>- Herbivory regulation</li> <li>- Fire management</li> </ul> |                                                                                                                                                                                                                                         |                                                                                                                                                                                          | Afforestation                                                                                       |
| (Cardinael et al., 2018)<br>IPCC Tier 1 coefficients for agroforestry systems |                                                                                                                                                                                                                                                                                                                                                                        | <ul style="list-style-type: none"> <li>- Alley cropping</li> <li>- Fallows</li> <li>- Hedgerows</li> <li>- Multistrata systems</li> <li>- Shaded perennial-crop systems</li> <li>- Silvo-arable systems</li> <li>- Parklands</li> </ul> | <ul style="list-style-type: none"> <li>- Parklands</li> <li>- Silvopastures</li> <li>- Hedgerows</li> </ul>                                                                              |                                                                                                     |
