# Supplementary material for: Semantics about soil organic carbon storage: DATA4C+, a comprehensive thesaurus and classification of management practices in agriculture and forestry
Source: Copernicus journal article supplement (doi:10.5194/soil-9-89-2023), 2023-02-10
Supplement: Supplementary file 1 [file Supplement 2_edit.xlsx]

## Sheet: sheet1
Land use	Reference
Annual and perennial croplands	Bai, X., Huang, Y., Ren, W., Coyne, M., Jacinthe, P.-A., Tao, B., Hui, D., Yang, J., Matocha, C., 2019. Responses of soil carbon sequestration to climate-smart agriculture practices: A meta-analysis. Glob. Change Biol. 25, 2591–2606. https://doi.org/10.1111/gcb.14658
Grasslands	Batjes, N.H., 2019. Technologically achievable soil organic carbon sequestration in world croplands and grasslands. Land Degradation & Development 30, 25–32. https://doi.org/10.1002/ldr.3209
Annual and perennial croplands, Grasslands	Cardinael, R., Umulisa, V., Toudert, A., Olivier, A., Bockel, L., Bernoux, M., 2018. Revisiting IPCC Tier 1 coefficients for soil organic and biomass carbon storage in agroforestry systems. Environ. Res. Lett. 13, 124020. https://doi.org/10.1088/1748-9326/aaeb5f
Annual and perennial croplands, Grasslands	Chambers, A., Lal, R., Paustian, K., 2016. Soil carbon sequestration potential of US croplands and grasslands: Implementing the 4 per Thousand Initiative. Journal of Soil and Water Conservation 71, 68A-74A. https://doi.org/10.2489/jswc.71.3.68A
Forests, Annual and perennial croplands, Grasslands	Chenu, C., Angers, D.A., Barré, P., Derrien, D., Arrouays, D., Balesdent, J., 2019. Increasing organic stocks in agricultural soils: Knowledge gaps and potential innovations. Soil Tillage Res., Soil Carbon and Climate Change: the 4 per Mille Initiative 188, 41–52. https://doi.org/10.1016/j.still.2018.04.011
Annual and perennial croplands, Grasslands, Land use change	Chotte, J.L., Aynekulu, E., Cowie, A., Campbell, E., Vlek, P., Lal, R., Kapovic-Solomun, M., Von Maltitz, G.P., Kust, G., Barger, N., 2019. Realising the Carbon Benefits of Sustainable Land Management Practices: Guidelines for estimation of soil organic carbon in the context of land degradation neutrality planning and monitoring. A report of the Science-Policy Interface. United Nations Convention…
Grasslands, Land use change	Conant, R.T., Cerri, C.E.P., Osborne, B.B., Paustian, K., 2017. Grassland management impacts on soil carbon stocks: a new synthesis. Ecol. Appl. 27, 662–668. https://doi.org/10.1002/eap.1473
Annual and perennial croplands, Grasslands	Corbeels, M., Cardinael, R., Naudin, K., Guibert, H., Torquebiau, E., 2019. The 4 per 1000 goal and soil carbon storage under agroforestry and conservation agriculture systems in sub-Saharan Africa. Soil Tillage Res., Soil Carbon and Climate Change: the 4 per Mille Initiative 188, 16–26. https://doi.org/10.1016/j.still.2018.02.015
Annual and perennial croplands	Davidson, E.A., De Abreu Sà, T.D., Reis Carvalho, C.J., De Oliveira Figueiredo, R., Kato, M.S.A., Kato, O.R., Ishida, F.Y., 2008. An integrated greenhouse gas assessment of an alternative to slash-and-burn agriculture in eastern Amazonia. Global Change Biology 14, 998–1007.
Annual and perennial croplands, Grasslands	Emde, D., Hannam, K.D., Most, I., Nelson, L.M., Jones, M.D., 2021. Soil organic carbon in irrigated agricultural systems: A meta-analysis. Global Change Biology 27, 3898–3910. https://doi.org/10.1111/gcb.15680
Annual and perennial croplands	Fujisaki, K., Chevallier, T., Chapuis-Lardy, L., Albrecht, A., Razafimbelo, T., Masse, D., Ndour, Y.B., Chotte, J.-L., 2018. Soil carbon stock changes in tropical croplands are mainly driven by carbon inputs: A synthesis. Agriculture, Ecosystems & Environment 259, 147–158. https://doi.org/10.1016/j.agee.2017.12.008
Forests, Annual and perennial croplands, Grasslands, Land use change	Griscom, B.W., Adams, J., Ellis, P.W., Houghton, R.A., Lomax, G., Miteva, D.A., Schlesinger, W.H., Shoch, D., Siikamäki, J.V., Smith, P., 2017. Natural climate solutions. Proceedings of the National Academy of Sciences 114, 11645–11650.
Annual and perennial croplands, Grasslands	Grover, S.P., Butterly, C.R., Wang, X., Gleeson, D.B., Macdonald, L.M., Hall, D., Tang, C., 2020. An agricultural practise with climate and food security benefits: “Claying” with kaolinitic clay subsoil decreased soil carbon priming and mineralisation in sandy cropping soils. Science of The Total Environment 709, 134488.
Annual and perennial croplands	Ledo, A., Hillier, J., Smith, P., Aguilera, E., Blagodatskiy, S., Brearley, F.Q., Datta, A., Diaz-Pines, E., Don, A., Dondini, M., Dunn, J., Feliciano, D.M., Liebig, M.A., Lang, R., Llorente, M., Zinn, Y.L., McNamara, N., Ogle, S., Qin, Z., Rovira, P., Rowe, R., Vicente-Vicente, J.L., Whitaker, J., Yue, Q., Zerihun, A., 2019. A global, empirical, harmonised dataset of soil organic carbon changes …
Annual and perennial croplands	Ledo, A., Smith, P., Zerihun, A., Whitaker, J., Vicente‐Vicente, J.L., Qin, Z., McNamara, N.P., Zinn, Y.L., Llorente, M., Liebig, M., Kuhnert, M., Dondini, M., Don, A., Diaz‐Pines, E., Datta, A., Bakka, H., Aguilera, E., Hillier, J., 2020. Changes in soil organic carbon under perennial crops. Global Change Biology 26, 4158–4168. https://doi.org/10.1111/gcb.15120
Annual and perennial croplands	Li, Y., Shi, S., Waqas, M.A., Zhou, X., Li, J., Wan, Y., Qin, X., Gao, Q., Liu, S., Wilkes, A., 2018. Long-term (≥20 years) application of fertilisers and straw return enhances soil carbon storage: a meta-analysis. Mitigation and adaptation strategies for global change 23, 603–619;
Annual and perennial croplands	Maillard, É., Angers, D.A., 2014. Animal manure application and soil organic carbon stocks: a meta-analysis. Global Change Biology 20, 666–679.
Forests	Mayer, M., Prescott, C.E., Abaker, W.E.A., Augusto, L., Cécillon, L., Ferreira, G.W.D., James, J., Jandl, R., Katzensteiner, K., Laclau, J.-P., Laganière, J., Nouvellon, Y., Paré, D., Stanturf, J.A., Vanguelova, E.I., Vesterdal, L., 2020. Tamm Review: Influence of forest management activities on soil organic carbon stocks: A knowledge synthesis. For. Ecol. Manag. 466, 118127. https://doi.org/10.1…
Forests	Noormets, A., Epron, D., Domec, J.C., McNulty, S.G., Fox, T., Sun, G., King, J.S., 2015. Effects of forest management on productivity and carbon sequestration: A review and hypothesis. Forest Ecology and Management, Carbon, water and nutrient cycling in managed forests 355, 124–140. https://doi.org/10.1016/j.foreco.2015.05.019
Forests, Annual and perennial croplands, Grasslands	Paradelo, R., Virto, I., Chenu, C., 2015. Net effect of liming on soil organic carbon stocks: A review. Agriculture, Ecosystems & Environment 202, 98–107.
Annual and perennial croplands, Grasslands	Paustian, K., Lehmann, J., Ogle, S., Reay, D., Robertson, G.P., Smith, P., 2016. Climate-smart soils. Nature 532, 49–57. https://doi.org/10.1038/nature17174
Annual and perennial croplands, Grasslands	Pellerin, S., Bamière, L., Launay, C., Martin, R., Schiavo, M., Angers, D., Augusto, L., Balesdent, J., Basile-Doelsch, I., Bellassen, V., 2020. Stocker du carbone dans les sols français. Quel potentiel au regard de l’objectif 4 pour 1000 et à quel coût? (Rapport scientifique de l’étude). INRA (France).
Annual and perennial croplands	Poeplau, C., Don, A., 2015. Carbon sequestration in agricultural soils via cultivation of cover crops – A meta-analysis. Agric. Ecosyst. Environ. 200, 33–41. https://doi.org/10.1016/j.agee.2014.10.024
Grasslands	Poeplau, C., Zopf, D., Greiner, B., Geerts, R., Korvaar, H., Thumm, U., Don, A., Heidkamp, A., Flessa, H., 2018. Why does mineral fertilisation increase soil carbon stocks in temperate grasslands? Agriculture, Ecosystems & Environment 265, 144–155.
Annual and perennial croplands	Powlson, D.S., Riche, A.B., Coleman, K., Glendining, M.J., Whitmore, A.P., 2008. Carbon sequestration in European soils through straw incorporation: Limitations and alternatives. Waste Management, OECD Workshop - Soils and Waste Management: A Challenge to Climate Change 28, 741–746.
Annual and perennial croplands, Grasslands, Land use change	Sanz, M.J., De Vente, J., Chotte, J.-L., Bernoux, M., Kust, G.S., Ruiz, I., Almagro, M., Alloza, J.-A., Vallejo, R., Castillo, V., 2017. Sustainable Land Management contribution to successful land-based climate change adaptation and mitigation. A Report of the Science-Policy Interface. United Nations Convention to Combat Desertification United Nations
Annual and perennial croplands, Grasslands	Shi, L., Feng, W., Xu, J., Kuzyakov, Y., 2018. Agroforestry systems: Meta-analysis of soil carbon stocks, sequestration processes, and future potentials. Land Degrad. Dev. 29, 3886–3897. https://doi.org/10.1002/ldr.3136
Forests, Annual and perennial croplands, Grasslands, Land use change	Smith, P., Calvin, K., Nkem, J., Campbell, D., Cherubini, F., Grassi, G., Korotkov, V., Hoang, A.L., Lwasa, S., McElwee, P., Nkonya, E., Saigusa, N., Soussana, J.-F., Taboada, M.A., Manning, F.C., Nampanzira, D., Arias‐Navarro, C., Vizzarri, M., House, J., Roe, S., Cowie, A., Rounsevell, M., Arneth, A., 2020. Which practices co-deliver food security, climate change mitigation and adaptation, and …
Annual and perennial croplands	Smith, P., Martino, D., Cai, Z., Gwary, D., Janzen, H., Kumar, P., McCarl, B., Ogle, S., O’Mara, F., Rice, C., Scholes, B., Sirotenko, O., Howden, M., McAllister, T., Pan, G., Romanenkov, V., Schneider, U., Towprayoon, S., Wattenbach, M., Smith, J., 2008. Greenhouse gas mitigation in agriculture. Philos. Trans. R. Soc. B Biol. Sci. 363, 789–813. https://doi.org/10.1098/rstb.2007.2184
Annual and perennial croplands	Trost, B., Prochnow, A., Drastig, K., Meyer-Aurich, A., Ellmer, F., Baumecker, M., 2013. Irrigation, soil organic carbon and N2O emissions. A review. Agron. Sustain. Dev. 33, 733–749. https://doi.org/10.1007/s13593-013-0134-0
Annual and perennial croplands, Grasslands	Vanlauwe, B., Bationo, A., Chianu, J., Giller, K.E., Merckx, R., Mokwunye, U., Ohiokpehai, O., Pypers, P., Tabo, R., Shepherd, K.D., Smaling, E.M.A., Woomer, P.L., Sanginga, N., 2010. Integrated Soil Fertility Management: Operational Definition and Consequences for Implementation and Dissemination. Outlook Agric 39, 17–24.
Forests	Wäldchen, J., Schulze, E.-D., Schöning, I., Schrumpf, M., Sierra, C., 2013. The influence of changes in forest management over the past 200years on present soil organic carbon stocks. Forest Ecology and Management 289, 243–254. https://doi.org/10.1016/j.foreco.2012.10.014
